# Supplementary material for: Animated Video Intervention Enhances Image Quality and Compliance in Pediatric Cranial MRI
Source: Research Square preprint supplement (doi:10.21203/rs.3.rs-7269642/v1), 2025-08-08
Supplement: Supplementary file 1 [file 3be8ffd35de7a2132d6aa082.docx]

Supplementary table1. Subgroup Analysis of Intervention Effects on MRI Outcomes Stratified by Sex and Age

| **Stratified** | **Sex** | | **Age** | | |
| --- | --- | --- | --- | --- | --- |
| Boys | Girls | < 36 mons | 3 ~ 7 y | > 7 y |
| **Quality of Images** | 0.45  (0.30, 0.66) | 0.48  (0.25, 0.89) | 0.36  (0.15, 0.82) | 0.39  (0.24, 0.64) | 0.56  (0.32, 0.97) |
| **No. Repeated scans** | 0.51  (0.34, 0.76) | 0.35  (0.16, 0.69) | 0.38  (0.14, 0.98) # | 0.42  (0.25, 0.70) | 0.51  (0.28, 0.90) |
| **Compliance** | 0.26  (0.17, 0.39) | 0.23  (0.11, 0.45) | 0.24  (0.09, 0.59) | 0.33  (0.20, 0.54) | 0.13  (0.05, 0.27) |
| **General Acceptance** | 0.23  (0.09, 0.56) | 0.16  (0.03, 0.69) | 0.12  (0.02, 0.57) | 0.24  (0.09, 0.61) | 0.25  (0.01, 1.82) # |
| **Examination Success** | 0.26  (0.18, 0.39) | 0.23  (0.11, 0.45) | 0.27  (0.12, 0.61) | 0.33  (0.29, 0.53) | 0.13  (0.05, 0.27) |
| **General Success** | 0.17  (0.05, 0.49) | 0.13  (0.01, 0.89) **#** | 0.16  (0.02, 0.81) | 0.16  (0.04, 0.49) | *Inf* |

**Note:**

# non-significant results (*p*>0.05).

Stratification: Sex (Boys: n=149; Girls: n=58); Age (<36 months: n=33; 3–7 years: n=90; >7 years: n=84).

Data represent adjusted odds ratios (aOR) with 95% confidence intervals (CI) from multivariate ordinal logistic regression for image quality, compliance, number of repeated scans, and examination success, and binary logistic regression for general acceptance and general success, adjusted for age, and sex (where applicable).

Inf: Infinite aOR due to sparse data (e.g., no unsuccessful outcomes in one group).

Variable definitions are consistent with Table 2.
